# Supplementary material for: Molecular and Survival Differences between Familial and Sporadic Gastric Cancers
Source: Hindawi journal article supplement (doi:10.1155/2013/396272), 2013-01-01
Supplement: f1 [file 396272.f1.pdf]

Supplementary table 1. Primer sequences used in the study for detection of CDH1 mutations and their annealing temperatures.

| Exon | Forward                  | Reverse                  | Tm ( °C) |
|------|--------------------------|--------------------------|----------|
| 1, 2 | TGTGAGCTTGCGGAAGTCA      | GCCAAGGAGGGAGCTTG        | 55       |
| 3    | GTGTTTGGTTTTGTGGGAGTCT   | GTCAACGGTACCAAGGCTGA     | 55       |
| 4,5  | GTCTGGCTAGGTTGGACTGTTAGA | GGATCCAGCATGGGTTGAC      | 55       |
| 6    | TCTCAGAGCCTAGGAAGGTGTG   | CAAGAAGTTCTGTCCGTAGGAAGG | 55       |
| 7    | AGGGCAGAATTGGATTAAG      | GGGCACAAGCTTAGATGCAA     | 50       |
| 8    | CGTGCCTAGAAGACAGGCAG     | CTTCACAATCTTGACCAATTG    | 50       |
| 9    | TGTCACATCTTCTCCTTGAAGCT  | CCACATGGTCCACTACAATCTG   | 50       |
| 10   | GAAAGTCATGGCAGAAACCACA   | AGGGAACAGGTGAAAGGAGCA    | 55       |
| 11   | TGTTGACCAGGCTGGTCTC      | ATGCATGTTATTTGGGTGACG    | 55       |
| 12   | CACTGAAGAGCCAGGACAAGAT   | ACAGAAGGGACAAGGAAGCAAG   | 50       |
| 13   | CTGCTCTCTTCACTCGGCTT     | TCTATTTTATGGAGGCTGGCA    | 50       |
| 14   | AGGCAGCTAGTGGCTGTCTAACT  | CTCGCTCACTGAGGTGCAGA     | 55       |
| 15   | GCAGTGAAGGCATCATCCAAC    | GCTCAGGCAAGCTGAAAACA     | 50       |
| 16   | CACAAGTCTGGGTGCATTGTC    | ATCTCAAGGGAAGGGAGCTG     | 55       |
